# Supplementary material
Source: ML conference proceedings conference paper supplement (https://openreview.net/forum?id=i0MsmV7hYZ)

# Toy1

Estimated Quantile

1.0  
0.9  
0.8  
0.7  
0.6  
0.5

Monte Carlo

0.705

Ours

0.687

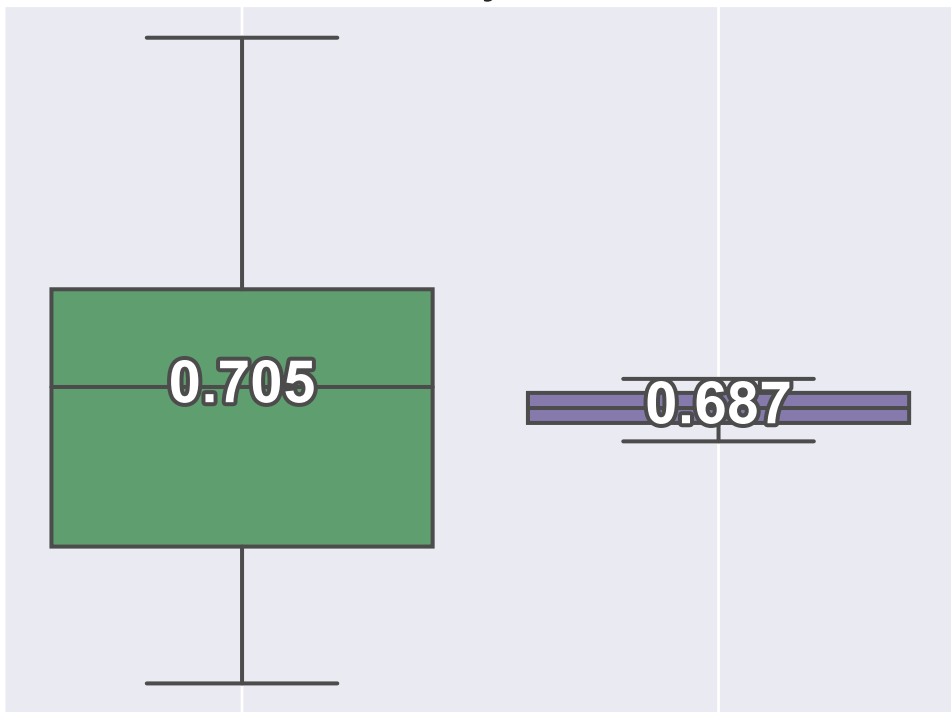

Supplement: supplementary_material [file attachment]

# Toy5

Estimated Quantile

1.0  
0.9  
0.8  
0.7  
0.6  
0.5

Monte Carlo

0.694

Ours

0.691

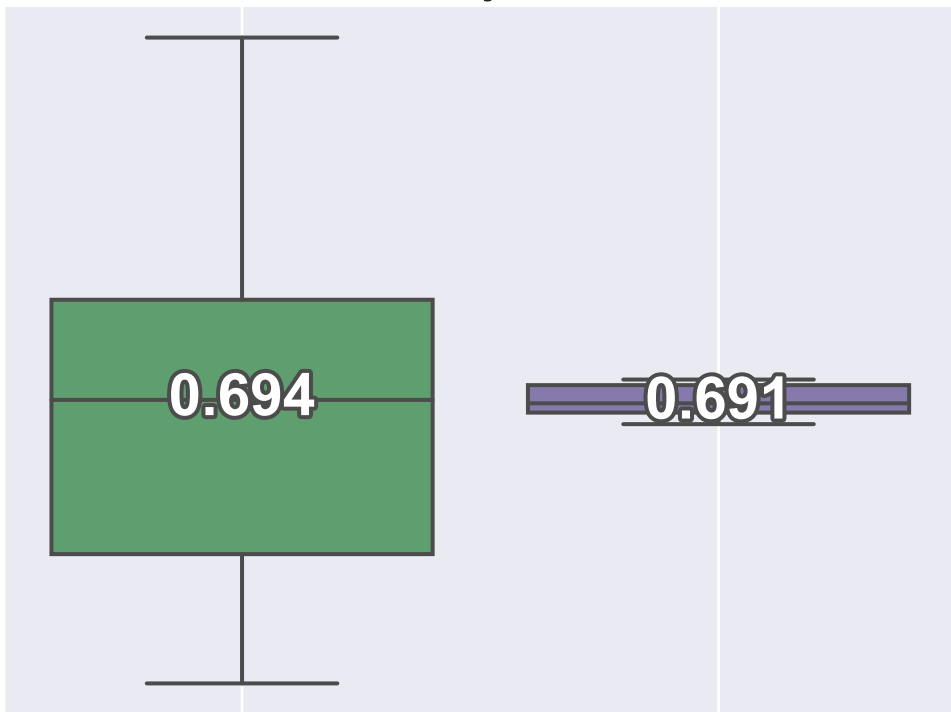

Supplement: supplementary_material [file attachment]

# Toy3

Estimated Quantile

1.0  
0.9  
0.8  
0.7  
0.6  
0.5

Monte Carlo

Ours

0.694

0.696

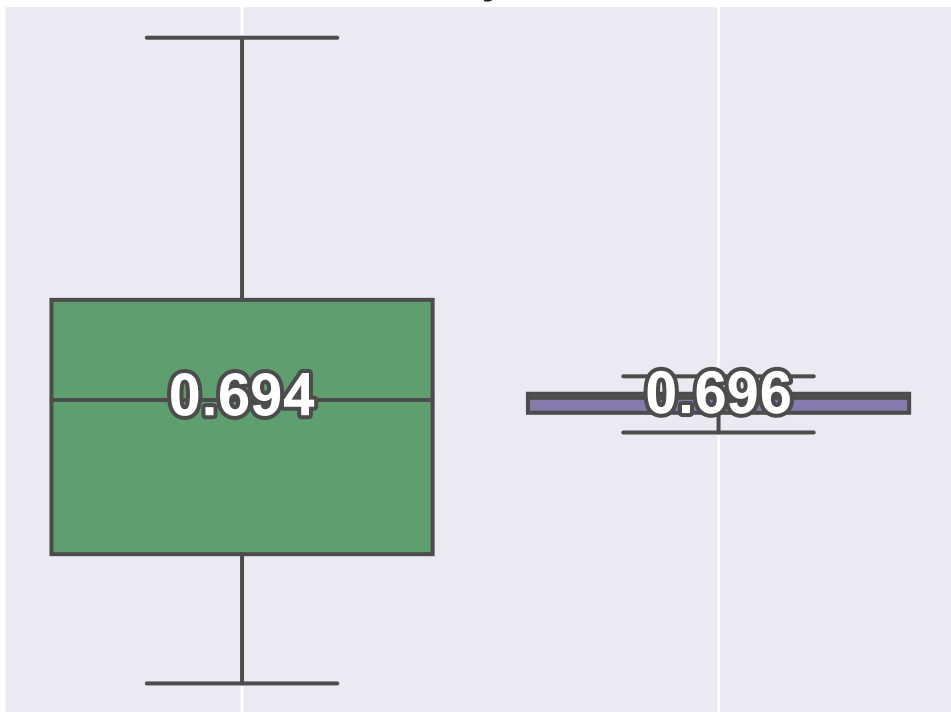

Supplement: supplementary_material [file attachment]

Toy1

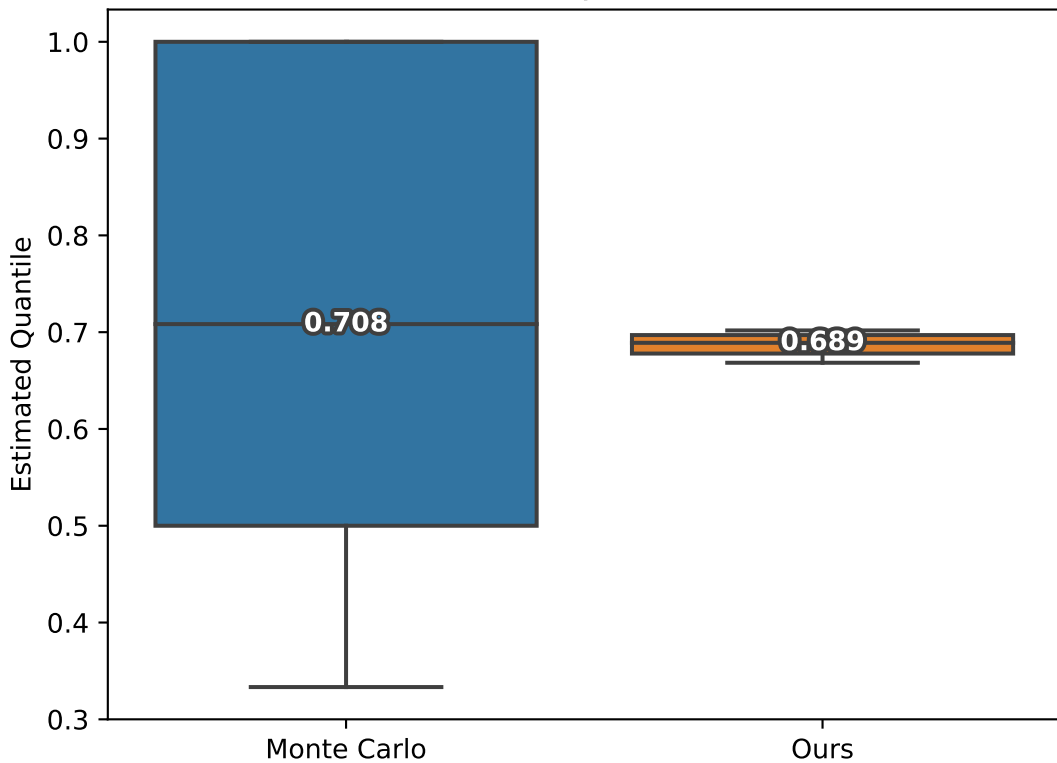

Supplement: supplementary_material [file attachment]

# Toy4

Estimated Quantile

0.74  
0.72  
0.70  
0.68  
0.66  
0.64

Monte Carlo

Ours

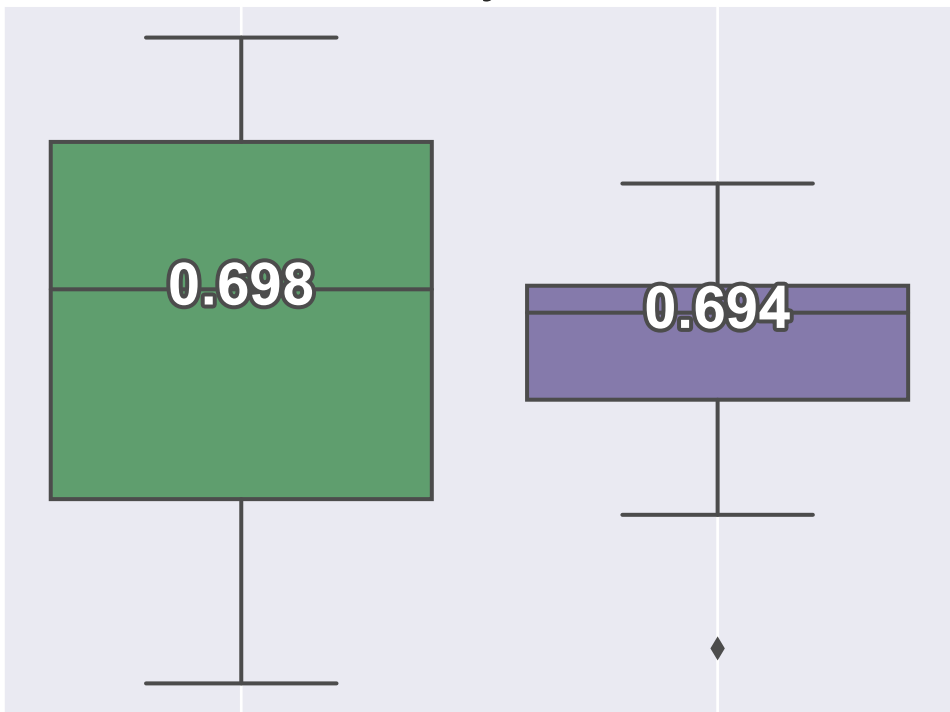

Supplement: supplementary_material [file attachment]

# Toy2

Estimated Quantile

1.0  
0.9  
0.8  
0.7  
0.6  
0.5

0.760

0.697

Monte Carlo

Ours

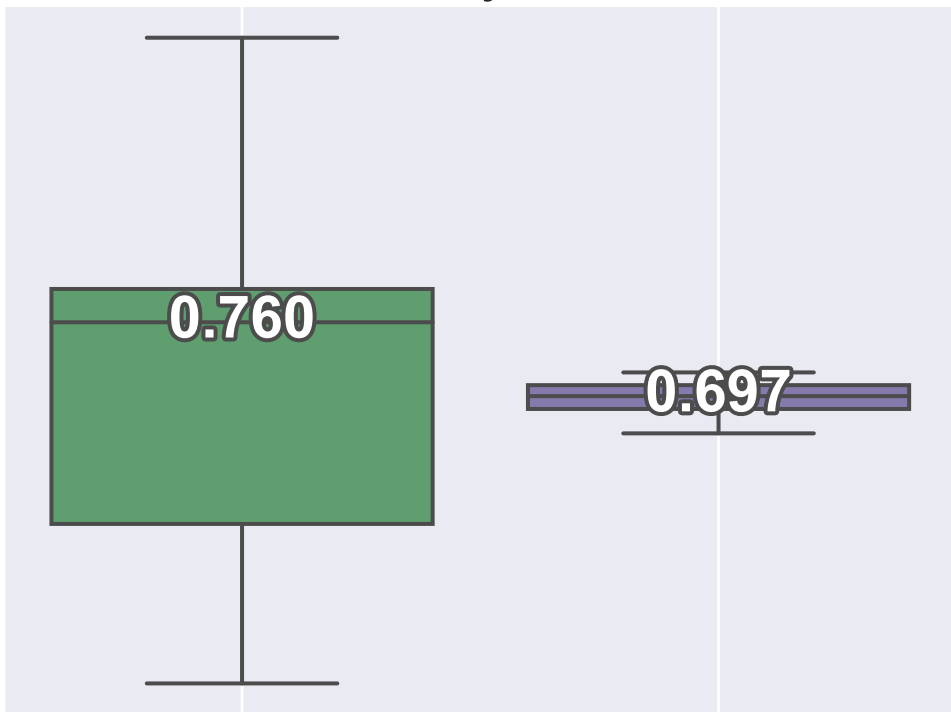

Supplement: supplementary_material [file attachment]
